# Supplementary material for: Does Social Interaction Spread Fear Among Institutional Investors? Evidence from Coronavirus Disease 2019
Source: Atypon-hosted journal article supplement (doi:10.1287/mnsc.2023.4814), 2023-05-31
Supplement: mnsc.2023.4814.sm1.pdf [file mnsc.2023.4814.sm1.pdf]

**Internet Appendix: Does Social Interaction Spread Fear among Institutional Investors? Evidence from COVID-19**

Shiu-Yik Au, Ming Dong, and Xinyao Zhou

**Table IA.1 Impact of COVID Hotspot and Social Connectedness on Stock Selling of Institutional Investors, 2016Q1 to 2020Q1, HiSCI Funds Far from Hotspots**

This table reports the results of the panel regressions on how the institutional investors' changes in share ownership differ across hotspot, high-SCI, and low-SCI counties between 2016Q1 and 2020Q1. *HiSCI* counties are defined as non-hotspot counties whose aggregate SCI to hotspot counties are in the top quartile and are restricted to counties at least 100 miles away from a hotspot. *Share Change (%)* is the change in the number of shares scaled by prior quarter number of shares. Refer to Appendix A for detailed variable definitions. Standard errors are double clustered by fund and firm, with *t*-statistics reported in parentheses. \*, \*\*, and \*\*\* indicate significance levels of 10%, 5%, and 1%, respectively.

|                               | (1)                   | (2)                  | (3)                  | (4)                   | (5)                   | (6)                   | (7)                   |
|-------------------------------|-----------------------|----------------------|----------------------|-----------------------|-----------------------|-----------------------|-----------------------|
| <i>Hotspot</i>                | -1.745<br>(-1.41)     | 0.571<br>(0.53)      | 0.292<br>(0.27)      |                       |                       |                       |                       |
| <i>Hotspot</i> × <i>COVID</i> | -9.204***<br>(-3.57)  | -8.555***<br>(-3.77) | -8.118***<br>(-3.64) | -8.462***<br>(-4.03)  | -8.102***<br>(-3.95)  | -8.470***<br>(-4.40)  | -8.248***<br>(-4.07)  |
| <i>HiSCI</i>                  | -1.130<br>(-0.87)     | -2.994***<br>(-3.10) | -3.501***<br>(-3.59) |                       |                       |                       |                       |
| <i>HiSCI</i> × <i>COVID</i>   | -8.737***<br>(-3.33)  | -7.911***<br>(-3.27) | -7.409***<br>(-3.14) | -9.296***<br>(-3.52)  | -8.911***<br>(-3.52)  | -9.159***<br>(-3.71)  | -9.018***<br>(-4.07)  |
| <i>GEO</i>                    | -1.858<br>(-1.47)     | -0.795<br>(-0.74)    | -1.302<br>(-1.16)    |                       |                       |                       |                       |
| <i>GEO</i> × <i>COVID</i>     | -11.933***<br>(-2.72) | -9.856**<br>(-2.47)  | -9.305**<br>(-2.34)  | -11.141***<br>(-2.79) | -10.707***<br>(-2.70) | -10.941***<br>(-2.90) | -10.240***<br>(-2.78) |
| <i>COVID</i>                  | 1.919<br>(1.07)       | 2.611<br>(1.47)      |                      | 1.827<br>(1.10)       |                       |                       |                       |
| Observations                  | 5,023,657             | 4,876,486            | 4,876,295            | 4,836,605             | 4,836,418             | 4,827,894             | 4,827,816             |
| Adjusted R <sup>2</sup>       | 0.001                 | 0.037                | 0.050                | 0.059                 | 0.074                 | 0.104                 | 0.132                 |
| Controls                      | No                    | Yes                  | Yes                  | Yes                   | Yes                   | Yes                   | Yes                   |
| Firm FE                       | No                    | No                   | Yes                  | No                    | Yes                   | No                    | No                    |
| Fund FE                       | No                    | No                   | No                   | Yes                   | Yes                   | Yes                   | No                    |
| Quarter FE                    | No                    | No                   | Yes                  | No                    | Yes                   | No                    | No                    |
| Fund × Industry FE            | No                    | No                   | No                   | Yes                   | Yes                   | Yes                   | Yes                   |
| Fund × Year FE                | No                    | No                   | No                   | No                    | No                    | No                    | Yes                   |
| Firm × Quarter FE             | No                    | No                   | No                   | No                    | No                    | Yes                   | Yes                   |

**Table IA.2 Fund Future Quarterly Return Regressions, Conditioning on Fund Manager Skill, HiSCI Funds Far from Hotspots**

This table reports panel regressions of future quarterly fund returns between 2016Q1 and 2020Q1, conditioning on fund manager's CAPM alpha in the past 5 years (col 1-2), Carhart 4 alpha in the past 5 years (col 3-4), and fund manager skill calculated as per Berk and van Binsbergen (2015) (col 5-6). *HiSCI* counties are defined as non-hotspot counties whose aggregate SCI to hotspot counties are in the top quartile and are restricted to counties at least 100 miles away from a hotspot. The dependent variable is the value-weighted fund return less fees in quarter  $q+1$  ( $VRet_{q+1}$ ). *Perf\_CAPM/Perf\_Car4/Perf\_BB* is an indicator variable set to 1 if the fund is in the top-tercile of CAPM alpha, Carhart-4 alpha or Berk and van Binsbergen (2015) manager skill and 0 otherwise. Control variables are identical to those in Table 2. Refer to Appendix A for detailed variable definitions. Standard errors are double clustered by fund and quarter, with *t*-statistics reported in parentheses. \*, \*\*, and \*\*\* indicate significance levels of 10%, 5%, and 1%, respectively.

| Skill Measure {Perf}                  | <i>Perf_CAPM</i>      |                      | <i>Perf_Car4</i>    |                      |                      | <i>Perf_BB</i>       |                       |                      |                      |
|---------------------------------------|-----------------------|----------------------|---------------------|----------------------|----------------------|----------------------|-----------------------|----------------------|----------------------|
|                                       | (1)                   | (2)                  | (3)                 | (4)                  | (5)                  | (6)                  | (7)                   | (8)                  | (9)                  |
| <i>Hotspot</i>                        | 0.065<br>(1.33)       | 0.044<br>(0.95)      |                     | 0.105<br>(1.62)      | 0.083<br>(1.25)      |                      | 0.135<br>(1.64)       | 0.116<br>(1.52)      |                      |
| <i>Hotspot</i> × <i>COVID</i>         | -0.355***<br>(-10.44) | -0.447***<br>(-8.81) | -0.187<br>(-0.86)   | -0.389***<br>(-7.26) | -0.454***<br>(-5.83) | -0.304<br>(-1.58)    | -0.674***<br>(-9.21)  | -0.668***<br>(-8.04) | -0.583**<br>(-2.88)  |
| <i>Hotspot</i> × <i>COVID</i> ×{Perf} | 0.104<br>(0.81)       | 0.238<br>(1.63)      | 0.137<br>(0.38)     | 0.535***<br>(5.96)   | 0.581***<br>(4.44)   | 0.719**<br>(2.11)    | 1.395***<br>(12.51)   | 1.353***<br>(10.50)  | 1.338***<br>(4.84)   |
| <i>HiSCI</i>                          | 0.171<br>(1.64)       | 0.153<br>(1.37)      |                     | 0.172<br>(1.50)      | 0.135<br>(1.11)      |                      | 0.285**<br>(2.49)     | 0.232**<br>(2.24)    |                      |
| <i>HiSCI</i> × <i>COVID</i>           | -0.789***<br>(-9.03)  | -0.938***<br>(-8.74) | -0.702**<br>(-2.89) | -0.580***<br>(-7.20) | -0.689***<br>(-6.04) | -0.566**<br>(-2.45)  | -0.818***<br>(-12.63) | -0.851***<br>(-7.35) | -0.692***<br>(-3.31) |
| <i>HiSCI</i> × <i>COVID</i> ×{Perf}   | 0.678***<br>(4.60)    | 0.857***<br>(5.57)   | 0.857**<br>(2.67)   | 0.516***<br>(3.22)   | 0.582***<br>(3.49)   | 0.783**<br>(2.41)    | 0.675***<br>(4.68)    | 0.671***<br>(4.66)   | 0.592**<br>(2.13)    |
| <i>GEO</i>                            | 0.170<br>(0.85)       | 0.172<br>(0.82)      |                     | 0.182<br>(0.77)      | 0.185<br>(0.75)      |                      | 0.172<br>(0.99)       | 0.191<br>(1.07)      |                      |
| <i>GEO</i> × <i>COVID</i>             | -0.611***<br>(-3.12)  | -0.718***<br>(-3.45) | -0.505*<br>(-1.98)  | -1.022***<br>(-4.44) | -1.041***<br>(-4.24) | -0.831***<br>(-3.57) | -1.003***<br>(-7.96)  | -0.873***<br>(-5.19) | -0.716***<br>(-3.55) |
| <i>GEO</i> × <i>COVID</i> ×{Perf}     | -0.549**<br>(-2.26)   | -0.332<br>(-1.41)    | -0.305<br>(-0.83)   | 0.922***<br>(3.58)   | 0.894***<br>(3.42)   | 0.824**<br>(2.33)    | 0.699***<br>(5.01)    | 0.586***<br>(3.37)   | 0.500*<br>(1.85)     |
| Observations                          | 43,675                | 43,297               | 43,255              | 43,675               | 43,297               | 43,255               | 50,509                | 49,723               | 49,714               |
| Adjusted R <sup>2</sup>               | 0.800                 | 0.801                | 0.813               | 0.799                | 0.800                | 0.813                | 0.799                 | 0.801                | 0.813                |
| Controls                              | No                    | Yes                  | Yes                 | No                   | Yes                  | Yes                  | No                    | Yes                  | Yes                  |
| Fund Style × Quarter FE               | Yes                   | Yes                  | Yes                 | Yes                  | Yes                  | Yes                  | Yes                   | Yes                  | Yes                  |
| Fund FE                               | No                    | No                   | Yes                 | No                   | No                   | Yes                  | No                    | No                   | Yes                  |

**Table IA.3 Impact of COVID Hotspot and Social Connectedness on Stock Selling of Institutional Investors, 2020Q1 (COVID Outbreak Period Only)**

This table reports the results of the cross-sectional analysis on how the institutional investors' changes in share ownership differ across hotspot, high-SCI, and low-SCI counties in 2020Q1. The dependent variables are reported on top of each column. *Share Change (%)* is the change in the number of shares over the quarter scaled by prior number of shares in percentage form. *Share Change Per Shroud* is the change in share holdings scaled by the total number of shares outstanding (in  $10^5$ s), which is calculated as the change in share number multiplied by the stock price at the beginning of the quarter. Refer to Appendix A for detailed variable definitions of other variables. Standard errors are double clustered by fund and firm, with *t*-statistics reported in parentheses. \*, \*\*, and \*\*\*\* indicate significance levels of 10%, 5%, and 1%, respectively.

|                         | (1)                   | (2)                   | (3)                  | (4)                  | (5)                     | (6)                  |
|-------------------------|-----------------------|-----------------------|----------------------|----------------------|-------------------------|----------------------|
|                         | <i>Share</i>          | <i>Share</i>          | <i>Share</i>         | <i>Share Change</i>  | <i>Share Change Per</i> | <i>Share Change</i>  |
|                         | <i>Change (%)</i>     | <i>Change(%)</i>      | <i>Change (%)</i>    | <i>Per Shroud</i>    | <i>Shroud</i>           | <i>Per Shroud</i>    |
| <i>Hotspot</i>          | -9.580***<br>(-3.58)  | -7.751***<br>(-3.98)  | -3.920***<br>(-2.67) | -3.666**<br>(-2.44)  | -2.418<br>(-1.51)       | -2.680*<br>(-1.69)   |
| <i>HiSCI</i>            | -13.642***<br>(-4.72) | -10.481***<br>(-4.36) | -8.065***<br>(-3.59) | -5.720***<br>(-3.31) | -4.553***<br>(-2.61)    | -4.478**<br>(-2.54)  |
| <i>GEO</i>              |                       | -4.703<br>(-1.35)     | -2.680<br>(-0.83)    |                      | -0.249<br>(-0.12)       | -0.570<br>(-0.29)    |
| <i>Flow</i>             |                       | 1.574***<br>(11.95)   | 1.439***<br>(10.76)  |                      | 0.596***<br>(6.62)      | 0.627***<br>(6.88)   |
| <i>HotspotCorp</i>      |                       |                       | -0.329<br>(-0.45)    |                      | -2.418                  | -0.496<br>(-1.00)    |
| <i>LnAge</i>            |                       |                       | 1.168<br>(0.54)      |                      |                         | -4.258***<br>(-4.51) |
| <i>LnAUM</i>            |                       |                       | -4.664***<br>(-3.82) |                      |                         | 1.535*<br>(1.72)     |
| <i>Fund_Mgt_Fees</i>    |                       |                       | -459.985<br>(-1.40)  |                      |                         | 66.898<br>(0.33)     |
| <i>Fund_Expense</i>     |                       |                       | -1.539<br>(-1.55)    |                      |                         | 0.159<br>(0.37)      |
| <i>Fund_Turnover</i>    |                       |                       | -0.003<br>(-0.01)    |                      |                         | -0.373<br>(-1.45)    |
| Observations            | 347,168               | 330,729               | 328,810              | 372,613              | 353,727                 | 351,710              |
| Adjusted R <sup>2</sup> | 0.048                 | 0.098                 | 0.108                | 0.222                | 0.182                   | 0.183                |
| Firm FE                 | Yes                   | Yes                   | Yes                  | Yes                  | Yes                     | Yes                  |

**Table IA.4 Impact of COVID Hotspot and Social Connectedness on Stock Selling of Institutional Investors: Alternative Definitions of Hotspot**

This table provides robustness results of the analysis on how the institutional investors' changes in share ownership differ across hotspot, high-SCI, and low-SCI counties using alternative definition of hotspot counties. Instead of using 2,000 as the threshold number of COVID cases by March 30, 2020, we use 2,500 cases and 1.5 cases per 100,000 population, respectively, to define *Hotspot*. Panel A reports cross sectional regression results using the 2020Q1 data, and Panel B reports results for the full sample between 2016Q1 and 2020Q1. The dependent variables are *Share Change (%)* which is the change in the number of shares over the quarter scaled by prior number of shares in percentage form. *HiSCI* is defined as non-hotspot counties whose aggregate SCI to hotspot counties are in the top quartile. *GEO* is defined as non-*Hotspot* counties, which are within 100 miles of any one of the hotspot counties. Refer to Appendix A for detailed variable definitions. Standard errors are double clustered by fund and firm, with *t*-statistics reported in parentheses. \*, \*\*, and \*\*\* indicate significance levels of 10%, 5%, and 1%, respectively.

*Panel A: Alternative Definition of Hotspot County in cross sectional analysis of Share Change %: 2016Q1(COVID Period)*

|                         | No. Cases $\geq$ 2,500 |                      | No. Cases per 100,000<br>Population $\geq$ 1.5 |                      |
|-------------------------|------------------------|----------------------|------------------------------------------------|----------------------|
|                         | (1)                    | (2)                  | (3)                                            | (4)                  |
| <i>Hotspot</i>          | -7.148**<br>(-2.41)    | -1.872<br>(-1.15)    | -9.951***<br>(-3.75)                           | -3.930***<br>(-2.70) |
| <i>HiSCI</i>            | -11.550***<br>(-4.09)  | -10.410**<br>(-2.07) | -13.790***<br>(-4.77)                          | -7.874***<br>(-3.14) |
| <i>GEO</i>              |                        | 4.142<br>(0.80)      |                                                | -1.749<br>(-0.45)    |
| Observations            | 347,168                | 328,810              | 347,168                                        | 328,810              |
| Adjusted R <sup>2</sup> | 0.045                  | 0.108                | 0.048                                          | 0.108                |
| Controls                | No                     | Yes                  | No                                             | Yes                  |
| Firm FE                 | Yes                    | Yes                  | Yes                                            | Yes                  |

*Panel B: Alternative Definition of Hotspot County in panel regression of Share Change %: 2016Q1 to 2020Q1*

|                                      | No. Cases $\geq$ 2,500 |                       |                       | No. Cases per 100,000 population $\geq$ 1.5 |                       |                       |
|--------------------------------------|------------------------|-----------------------|-----------------------|---------------------------------------------|-----------------------|-----------------------|
|                                      | (1)                    | (2)                   | (3)                   | (4)                                         | (5)                   | (6)                   |
| <i>Hotspot</i>                       | 0.453<br>(0.40)        |                       |                       | 1.056<br>(1.04)                             |                       |                       |
| <i>Hotspot</i> $\times$ <i>COVID</i> | -5.917**<br>(-2.51)    | -5.841***<br>(-2.73)  | -5.401***<br>(-2.46)  | -8.985***<br>(-4.10)                        | -8.665***<br>(-4.38)  | -8.606***<br>(-4.26)  |
| <i>HiSCI</i>                         | 0.325<br>(0.32)        |                       |                       | -1.563*<br>(-1.94)                          |                       |                       |
| <i>HiSCI</i> $\times$ <i>COVID</i>   | -12.551**<br>(-2.33)   | -14.946***<br>(-2.69) | -13.545***<br>(-2.33) | -9.620***<br>(-3.35)                        | -10.794***<br>(-3.68) | -10.527***<br>(-3.58) |
| <i>GEO</i>                           | -1.849*<br>(-1.66)     |                       |                       | 0.847<br>(0.95)                             |                       |                       |
| <i>GEO</i> $\times$ <i>COVID</i>     | 3.647<br>(0.67)        | 4.645<br>(0.84)       | 4.241<br>(0.75)       | -5.096<br>(-1.17)                           | -5.130<br>(-1.16)     | -4.869<br>(-1.13)     |
| <i>COVID</i>                         | 0.622<br>(0.39)        |                       |                       | 2.966*<br>(1.72)                            |                       |                       |
| Observations                         | 4,876,486              | 4,836,418             | 4,827,816             | 4,876,486                                   | 4,836,418             | 4,827,816             |
| Adjusted R <sup>2</sup>              | 0.036                  | 0.074                 | 0.132                 | 0.037                                       | 0.074                 | 0.132                 |
| Controls                             | Yes                    | Yes                   | Yes                   | Yes                                         | Yes                   | Yes                   |
| Firm FE                              | No                     | Yes                   | No                    | No                                          | Yes                   | No                    |
| Fund FE                              | No                     | Yes                   | No                    | No                                          | Yes                   | No                    |
| Quarter FE                           | No                     | Yes                   | No                    | No                                          | Yes                   | No                    |
| Fund $\times$ Industry FE            | No                     | Yes                   | Yes                   | No                                          | Yes                   | Yes                   |
| Fund $\times$ Year FE                | No                     | No                    | Yes                   | No                                          | No                    | Yes                   |
| Firm $\times$ Quarter FE             | No                     | No                    | Yes                   | No                                          | No                    | Yes                   |

**Table IA.5 Impact of COVID Hotspot and Social Connectedness on Stock Selling of Institutional Investors: Alternate Measurement of Share Change**

This table reports the results of the panel regressions on how the institutional investors' changes in share ownership differ across hotspot, high-SCI, and low-SCI counties between Q1 of 2016 and Q1 of 2020. *Share Change Per Shroud* is the change in share holdings scaled by the total number of shares outstanding (in  $10^{-5}$ s). *COVID* is an indicator variable set to 1 if the time period is 2020Q1 and 0 otherwise. Controls are similar to Table 2. Refer to Appendix A for detailed variable definitions. Standard errors are double clustered by fund and firm, with *t*-statistics reported in parentheses. \*, \*\*, and \*\*\* indicate significance levels of 10%, 5%, and 1%, respectively.

|                               | (1)<br><i>Share Change Per<br/>Shroud</i> | (2)<br><i>Share Change Per<br/>Shroud</i> | (3)<br><i>Share Change Per<br/>Shroud</i> |
|-------------------------------|-------------------------------------------|-------------------------------------------|-------------------------------------------|
| <i>Hotspot</i>                | -1.537<br>(-1.59)                         |                                           |                                           |
| <i>Hotspot</i> × <i>COVID</i> | -0.699<br>(-0.29)                         | -3.474<br>(-1.411)                        | -2.177<br>(-1.25)                         |
| <i>HiSCI</i>                  | -1.391<br>(-1.39)                         |                                           |                                           |
| <i>HiSCI</i> × <i>COVID</i>   | -4.720*<br>(-1.65)                        | -8.082***<br>(-3.065)                     | -4.178**<br>(-2.09)                       |
| <i>GEO</i>                    | -0.830<br>(-0.85)                         |                                           |                                           |
| <i>GEO</i> × <i>COVID</i>     | 1.632<br>(0.64)                           | -1.693<br>(-0.622)                        | -1.463<br>(-0.74)                         |
| <i>COVID</i>                  | -3.535*<br>(-1.75)                        |                                           |                                           |
| Observations                  | 5,335,611                                 | 5,300,770                                 | 5,300,711                                 |
| Adjusted R <sup>2</sup>       | 0.000                                     | 0.317                                     | 0.323                                     |
| Controls                      | Yes                                       | Yes                                       | Yes                                       |
| Firm FE                       | No                                        | No                                        | No                                        |
| Fund FE                       | No                                        | Yes                                       | No                                        |
| Quarter FE                    | No                                        | No                                        | No                                        |
| Fund × Industry FE            | No                                        | Yes                                       | Yes                                       |
| Fund × Year FE                | No                                        | No                                        | Yes                                       |
| Firm × Quarter FE             | No                                        | Yes                                       | Yes                                       |

**Table IA.6 Impact of COVID Hotspot and Social Connectedness on Stock Selling of Institutional Investors, 2016 to 2020 (Monthly Data), with Fund × Calendar Month Fixed Effects**

This table is similar to Table 7 but the regression model includes fund × calendar month fixed effects. It reports the results of the panel regressions on how the institutional investors' changes in share ownership differ across hotspot, high-SCI, and low-SCI counties between 2016 and 2020, using monthly data. *Share Change (%)* is the change in the number of shares over the quarter scaled by prior number of shares in percentage form. *COVID* is an indicator variable set to 1 if the year is Jan-Dec 2020 and 0 otherwise in columns 1-12, respectively. Refer to Appendix A for detailed variable definitions. Standard errors are double clustered by fund and firm, with *t*-statistics reported in parentheses. \*, \*\*, and \*\*\* indicate significance levels of 10%, 5%, and 1%, respectively.

| Month                         | (1)<br>Jan         | (2)<br>Feb        | (3)<br>Mar           | (4)<br>Apr         | (5)<br>May        | (6)<br>Jun        | (7)<br>Jul        | (8)<br>Aug         | (9)<br>Sep        | (10)<br>Oct           | (11)<br>Nov       | (12)<br>Dec          |
|-------------------------------|--------------------|-------------------|----------------------|--------------------|-------------------|-------------------|-------------------|--------------------|-------------------|-----------------------|-------------------|----------------------|
| <i>Hotspot</i>                |                    |                   |                      |                    |                   |                   |                   |                    |                   |                       |                   |                      |
| <i>Hotspot</i> × <i>COVID</i> | -0.084<br>(-0.12)  | -0.518<br>(-0.92) | -5.461***<br>(-3.33) | 1.451<br>(1.63)    | -0.801<br>(-0.57) | 0.189<br>(0.10)   | 1.539*<br>(1.70)  | 3.357***<br>(3.76) | -1.687<br>(-0.94) | -1.297<br>(-0.48)     | -2.412<br>(-1.55) | -4.427**<br>(-2.29)  |
| <i>HiSCI</i>                  |                    |                   |                      |                    |                   |                   |                   |                    |                   |                       |                   |                      |
| <i>HiSCI</i> × <i>COVID</i>   | -0.539<br>(-0.81)  | -0.630<br>(-1.52) | -7.865***<br>(-4.06) | -0.225<br>(-0.28)  | -0.961<br>(-1.32) | 1.210<br>(0.81)   | -0.571<br>(-0.96) | 0.954*<br>(1.92)   | 1.350<br>(1.28)   | 2.886<br>(1.01)       | -1.336<br>(-0.67) | -2.458<br>(-0.62)    |
| <i>GEO</i>                    |                    |                   |                      |                    |                   |                   |                   |                    |                   |                       |                   |                      |
| <i>GEO</i> × <i>COVID</i>     | 2.429***<br>(2.61) | 0.718<br>(1.47)   | -7.910***<br>(-3.67) | 3.731***<br>(3.00) | 0.064<br>(-0.71)  | -0.914<br>(-0.59) | 0.543<br>(1.00)   | 0.574<br>(1.23)    | -0.037<br>(-0.03) | -11.689***<br>(-3.32) | -3.805<br>(-1.48) | -12.454**<br>(-1.98) |
| <i>COVID</i>                  |                    |                   |                      |                    |                   |                   |                   |                    |                   |                       |                   |                      |
| Observations                  | 17,312,249         | 17,312,249        | 17,312,249           | 17,312,249         | 17,312,249        | 17,312,249        | 17,312,249        | 17,312,249         | 17,312,249        | 17,312,249            | 17,312,249        | 17,312,249           |
| Adjusted R <sup>2</sup>       | 0.117              | 0.117             | 0.118                | 0.117              | 0.117             | 0.117             | 0.117             | 0.117              | 0.117             | 0.117                 | 0.117             | 0.117                |
| Controls                      | Yes                | Yes               | Yes                  | Yes                | Yes               | Yes               | Yes               | Yes                | Yes               | Yes                   | Yes               | Yes                  |
| Firm × Month FE               | Yes                | Yes               | Yes                  | Yes                | Yes               | Yes               | Yes               | Yes                | Yes               | Yes                   | Yes               | Yes                  |
| Fund × Calendar Month FE      | Yes                | Yes               | Yes                  | Yes                | Yes               | Yes               | Yes               | Yes                | Yes               | Yes                   | Yes               | Yes                  |
| Fund × Industry FE            | Yes                | Yes               | Yes                  | Yes                | Yes               | Yes               | Yes               | Yes                | Yes               | Yes                   | Yes               | Yes                  |

**Table IA.7 Fund Future Return Regressions, Conditioning on Fund Manager Skill (Monthly Data, 2020Q2)**

This table is similar to Table 6 and reports results of the panel regressions of future fund returns ( $VRet_{m+1}$ , monthly returns over month  $m+1$  where  $m$  is the month of stock trading) between 2016 and 2020, conditioning on fund manager's CAPM alpha in the past 5 years, Carhart 4 alpha in the past 5 years, and fund manager skill calculated as per Berk and van Binsbergen (2015). The dependent variable is the value-weighted return of the fund less fees in month  $m+1$  ( $VRet_{m+1}$ ).  $Perf\_CAPM/Perf\_Car4/Perf\_BB$  is an indicator variable set to 1 if the fund is in the top-tercile of CAPM alpha, Carhart-4 alpha, or Berk and van Binsbergen (2015) manager skill and 0 otherwise.  $COVID$  is an indicator variable set to 1 if it is Apr 2020 (cols 1, 4, and 7), May 2020 (cols 2, 5, 8), or June 2020 (cols 3, 6, 9). Control variables are identical to those in Table 3. Refer to Appendix A for detailed variable definitions. Standard errors are double clustered by fund and quarter, with  $t$ -statistics reported in parentheses. \*, \*\*, and \*\*\* indicate significance levels of 10%, 5%, and 1%, respectively.

| Skill Measure {Perf}                  | Perf_CAPM            |                    |                    | Perf_Car4           |                     |                    | Perf_BB            |                     |                   |
|---------------------------------------|----------------------|--------------------|--------------------|---------------------|---------------------|--------------------|--------------------|---------------------|-------------------|
|                                       | (1)                  | (2)                | (3)                | (4)                 | (5)                 | (6)                | (7)                | (8)                 | (9)               |
| $VRet_{m+1} =$                        | Apr                  | May                | Jun                | Apr                 | May                 | Jun                | Apr                | May                 | Jun               |
| <i>Hotspot</i>                        |                      |                    |                    |                     |                     |                    |                    |                     |                   |
| <i>Hotspot</i> × <i>COVID</i>         | -0.066<br>(-0.51)    | -0.193*<br>(-1.71) | 0.077<br>(1.61)    | -0.124<br>(-1.03)   | -0.169<br>(-1.46)   | -0.055<br>(-0.92)  | -0.289<br>(-1.21)  | -0.350**<br>(-2.60) | 0.057<br>(0.89)   |
| <i>Hotspot</i> × <i>COVID</i> ×{Perf} | -0.294*<br>(-1.81)   | -0.140<br>(-1.65)  | 0.125<br>(1.32)    | -0.155<br>(-0.61)   | -0.088<br>(-0.42)   | 0.541***<br>(3.74) | 0.479*<br>(1.89)   | 0.563***<br>(3.04)  | 0.183<br>(1.14)   |
| <i>HiSCI</i>                          |                      |                    |                    |                     |                     |                    |                    |                     |                   |
| <i>HiSCI</i> × <i>COVID</i>           | -0.423***<br>(-3.46) | -0.161*<br>(-1.77) | -0.047<br>(-0.83)  | -0.332**<br>(-2.13) | -0.127<br>(-1.39)   | -0.013<br>(-0.29)  | -0.293*<br>(-2.00) | -0.092<br>(-1.04)   | -0.071<br>(-1.03) |
| <i>HiSCI</i> × <i>COVID</i> ×{Perf}   | 0.705***<br>(3.16)   | -0.144<br>(-0.63)  | 0.220**<br>(2.20)  | 0.464*<br>(1.91)    | -0.084<br>(-0.40)   | 0.168<br>(1.08)    | 0.317***<br>(2.77) | -0.153<br>(-1.55)   | 0.366**<br>(2.11) |
| <i>GEO</i>                            |                      |                    |                    |                     |                     |                    |                    |                     |                   |
| <i>GEO</i> × <i>COVID</i>             | 0.030<br>(0.12)      | -0.110<br>(-1.61)  | 0.120<br>(1.47)    | -0.326<br>(-1.42)   | -0.165**<br>(-2.16) | 0.090<br>(1.05)    | -0.227<br>(-0.82)  | -0.036<br>(-0.33)   | 0.013<br>(0.10)   |
| <i>GEO</i> × <i>COVID</i> ×{Perf}     | -0.865***<br>(-4.08) | 0.087<br>(0.29)    | -0.348*<br>(-2.01) | 0.149<br>(0.90)     | 0.285<br>(1.30)     | -0.233<br>(-1.44)  | -0.083<br>(-0.21)  | 0.004<br>(0.02)     | 0.066<br>(0.38)   |
| {Perf}                                | 0.002<br>(0.02)      | -0.020<br>(-0.15)  | -0.012<br>(-0.09)  | -0.042<br>(-0.57)   | -0.057<br>(-0.80)   | -0.052<br>(-0.73)  | -0.159<br>(-1.58)  | -0.148<br>(-1.48)   | -0.131<br>(-1.31) |

**Table IA.7 Fund Future Return Regressions, Conditioning on Fund Manager Skill (Monthly data, 2020Q2) (continued)**

| Skill Measure $\{Perf\}$    | <i>Perf_CAPM</i>  |                    |                   | <i>Perf_Car4</i>  |                   |                   | <i>Perf_BB</i>    |                   |                      |
|-----------------------------|-------------------|--------------------|-------------------|-------------------|-------------------|-------------------|-------------------|-------------------|----------------------|
|                             | (1)               | (2)                | (3)               | (4)               | (5)               | (6)               | (7)               | (8)               | (9)                  |
| $VRet_{m+1} =$              | Apr               | May                | Jun               | Apr               | May               | Jun               | Apr               | May               | Jun                  |
| <i>COVID</i> × $\{Perf\}$   | -0.133<br>(-0.24) | 0.936***<br>(2.86) | 0.411<br>(1.22)   | -0.406<br>(-1.21) | 0.310<br>(1.66)   | 0.052<br>(0.24)   | 0.299<br>(0.66)   | -0.105<br>(-0.45) | -0.658***<br>(-9.12) |
| <i>Hotspot</i> × $\{Perf\}$ | 0.095**<br>(2.45) | 0.089**<br>(2.44)  | 0.084**<br>(2.14) | 0.121**<br>(2.41) | 0.118**<br>(2.38) | 0.102**<br>(2.07) | 0.021<br>(0.25)   | 0.018<br>(0.24)   | 0.023<br>(0.34)      |
| <i>HiSCI</i> × $\{Perf\}$   | -0.010<br>(-0.18) | 0.005<br>(0.10)    | 0.000<br>(0.01)   | 0.044<br>(0.76)   | 0.056<br>(1.03)   | 0.050<br>(0.90)   | 0.030<br>(0.29)   | 0.042<br>(0.41)   | 0.027<br>(0.27)      |
| <i>GEO</i> × $\{Perf\}$     | 0.018<br>(0.32)   | -0.003<br>(-0.04)  | 0.007<br>(0.12)   | -0.002<br>(-0.04) | -0.004<br>(-0.11) | 0.008<br>(0.19)   | -0.093<br>(-0.95) | -0.096<br>(-0.99) | -0.099<br>(-1.03)    |
| Observations                | 140,904           | 140,904            | 140,904           | 140,904           | 140,904           | 140,904           | 153,291           | 153,291           | 153,291              |
| Adjusted R <sup>2</sup>     | 0.864             | 0.864              | 0.864             | 0.864             | 0.864             | 0.864             | 0.860             | 0.860             | 0.860                |
| Controls                    | Yes               | Yes                | Yes               | Yes               | Yes               | Yes               | Yes               | Yes               | Yes                  |
| Fund FE                     | Yes               | Yes                | Yes               | Yes               | Yes               | Yes               | Yes               | Yes               | Yes                  |
| Fund Style × Month FE       | Yes               | Yes                | Yes               | Yes               | Yes               | Yes               | Yes               | Yes               | Yes                  |

**Table IA.8 Impact of COVID Hotspot and Social Connectedness on Stock Selling of Institutional Investors, 2016Q1 to 2020Q1 (Demeaned HiSCI)**

This table is similar to Table 3 except that it uses demeaned *SCI*. We demean the *SCI* scores to a relative measure by calculating each county's mean *SCI* to all other counties and then subtracting the county's mean *SCI* for each county pair. The *HiSCI* score is then recalculate based on this demeaned value. *Share Change (%)* is the change in the number of shares over the quarter scaled by prior number of shares in percentage form. *COVID* is an indicator variable set to 1 if the time period is 2020Q1 and 0 otherwise. Control variables are identical to Table 3. Refer to Appendix A for detailed variable definitions. Standard errors are double clustered by fund and firm, with *t*-statistics reported in parentheses. \*, \*\*, and \*\*\* indicate significance levels of 10%, 5%, and 1%, respectively.

|                               | (1)                     | (2)                     | (3)                     |
|-------------------------------|-------------------------|-------------------------|-------------------------|
|                               | <i>Share Change (%)</i> | <i>Share Change (%)</i> | <i>Share Change (%)</i> |
| <i>Hotspot</i>                | 1.105<br>(1.05)         |                         |                         |
| <i>Hotspot</i> × <i>COVID</i> | -8.636***<br>(-3.77)    | -8.634***<br>(-4.28)    | -8.148***<br>(-3.83)    |
| <i>HiSCI</i>                  | -1.105<br>(-1.37)       |                         |                         |
| <i>HiSCI</i> × <i>COVID</i>   | -7.513***<br>(-2.88)    | -9.126***<br>(-3.36)    | -8.073***<br>(-3.12)    |
| <i>GEO</i>                    | 0.321<br>(0.38)         |                         |                         |
| <i>GEO</i> × <i>COVID</i>     | -6.328*<br>(-1.68)      | -6.527*<br>(-1.74)      | -6.157*<br>(-1.66)      |
| <i>COVID</i>                  | 2.700<br>(1.49)         |                         |                         |
| Observations                  | 4,876,486               | 4,827,894               | 4,827,816               |
| Adjusted R <sup>2</sup>       | 0.036                   | 0.105                   | 0.132                   |
| Controls                      | Yes                     | Yes                     | Yes                     |
| Firm × Quarter FE             | No                      | Yes                     | Yes                     |
| Fund FE                       | No                      | Yes                     | No                      |
| Fund × Year FE                | No                      | No                      | Yes                     |
| Fund × Industry FE            | No                      | Yes                     | Yes                     |

**Table IA.9 Fund Future Quarterly Return Regressions, Conditioning on Fund Manager Skill (Demeaned HiSCI)**

This table is similar to Table 6 except that it uses demeaned SCI. We demean the SCI scores to a relative measure by calculating each county's mean SCI to all other counties and then subtracting the county's mean SCI for each county pair. The *HiSCI* score is then recalculate based on this demeaned value. The dependent variable is the value-weighted return of the fund less fees in quarter  $q+1$  ( $VRet_{q+1}$ ). *Perf\_CAPM/Perf\_Car4/Perf\_BB* is an indicator variable set to 1 if the fund is in the top-tercile of CAPM alpha, Carhart-4 alpha, or Berk and van Binsbergen (2015) manager skill and 0 otherwise (cols 1-3, respectively). *COVID* is an indicator variable set to 1 if the time period is 2020Q1 and 0 otherwise. Control variables are identical to those in Table 3. Refer to Appendix A for detailed variable definitions. Standard errors are double clustered by fund and quarter, with *t*-statistics reported in parentheses. \*, \*\*, and \*\*\* indicate significance levels of 10%, 5%, and 1%, respectively.

| Skill Measure {Perf}                  | <i>Perf_CAPM</i>     | <i>Perf_Car4</i>     | <i>Perf_BB</i>       |
|---------------------------------------|----------------------|----------------------|----------------------|
|                                       | (1)                  | (2)                  | (3)                  |
| <i>Hotspot</i>                        |                      |                      |                      |
| <i>Hotspot</i> × <i>COVID</i>         | -0.263<br>(-1.31)    | -0.480**<br>(-2.59)  | -0.536**<br>(-2.75)  |
| <i>Hotspot</i> × <i>COVID</i> ×{Perf} | 0.237<br>(0.78)      | 1.053***<br>(3.48)   | 1.252***<br>(4.68)   |
| <i>HiSCI</i>                          |                      |                      |                      |
| <i>HiSCI</i> × <i>COVID</i>           | -0.826***<br>(-5.08) | -0.982***<br>(-6.30) | -0.530***<br>(-3.14) |
| <i>HiSCI</i> × <i>COVID</i> ×{Perf}   | 1.097***<br>(4.27)   | 1.712***<br>(6.46)   | 0.318<br>(1.45)      |
| <i>GEO</i>                            |                      |                      |                      |
| <i>GEO</i> × <i>COVID</i>             | -0.023<br>(-0.11)    | -0.414**<br>(-2.27)  | -0.389**<br>(-2.21)  |
| <i>GEO</i> × <i>COVID</i> ×{Perf}     | -1.017***<br>(-3.29) | 0.166<br>(0.56)      | 0.249<br>(1.04)      |
| {Perf}                                | 0.256<br>(0.42)      | 0.030<br>(0.08)      | -0.275<br>(-0.82)    |
| <i>COVID</i> ×{Perf}                  | 0.837<br>(1.19)      | -0.799*<br>(-1.95)   | -0.639**<br>(-2.69)  |
| <i>Hotspot</i> ×{Perf}                | 0.251*<br>(2.02)     | 0.180<br>(1.32)      | 0.037<br>(0.13)      |
| <i>HiSCI</i> ×{Perf}                  | -0.007<br>(-0.03)    | 0.017<br>(0.07)      | 0.071<br>(0.31)      |
| <i>GEO</i> ×{Perf}                    | 0.014<br>(0.07)      | 0.032<br>(0.17)      | -0.429<br>(-1.50)    |
| Observations                          | 46,531               | 46,531               | 49,714               |
| Adjusted R <sup>2</sup>               | 0.815                | 0.814                | 0.813                |
| Controls                              | Yes                  | Yes                  | Yes                  |
| Fund FE                               | Yes                  | Yes                  | Yes                  |
| Fund Style × Quarter FE               | Yes                  | Yes                  | Yes                  |

**Table IA.10 Impact of COVID Hotspot and Social Connectedness on Stock Selling of Institutional Investors, 2016Q1 to 2020Q1 (Excluding Funds in the Tri-State Area)**

This table is similar to Table 3 except that it excludes funds located in the tristate region (NY, NJ, CT). *Share Change (%)* is the change in the number of shares over the quarter scaled by prior number of shares in percentage form. *COVID* is an indicator variable set to 1 if the time period is 2020Q1 and 0 otherwise. Control variables are identical to Table 3. Refer to Appendix A for detailed variable definitions. Standard errors are double clustered by fund and firm, with *t*-statistics reported in parentheses. \*, \*\*, and \*\*\* indicate significance levels of 10%, 5%, and 1%, respectively.

|                               | (1)                     | (2)                     | (3)                     |
|-------------------------------|-------------------------|-------------------------|-------------------------|
|                               | <i>Share Change (%)</i> | <i>Share Change (%)</i> | <i>Share Change (%)</i> |
| <i>Hotspot</i>                | -0.125<br>(-0.13)       |                         |                         |
| <i>Hotspot</i> × <i>COVID</i> | -9.967***<br>(-5.10)    | -9.782***<br>(-6.04)    | -11.672***<br>(-6.33)   |
| <i>HiSCI</i>                  | -2.450***<br>(-2.72)    |                         |                         |
| <i>HiSCI</i> × <i>COVID</i>   | -7.297***<br>(-3.34)    | -8.465***<br>(-3.69)    | -8.294***<br>(-3.88)    |
| <i>GEO</i>                    | -2.381**<br>(-2.38)     |                         |                         |
| <i>GEO</i> × <i>COVID</i>     | -0.861<br>(-0.19)       | -0.353<br>(-0.08)       | -1.743<br>(-0.38)       |
| <i>COVID</i>                  | 2.028<br>(1.18)         |                         |                         |
| Observations                  | 3,689,597               | 3,651,618               | 3,651,560               |
| Adjusted R <sup>2</sup>       | 0.038                   | 0.117                   | 0.148                   |
| Controls                      | Yes                     | Yes                     | Yes                     |
| Firm × Quarter FE             | No                      | Yes                     | Yes                     |
| Fund FE                       | No                      | Yes                     | No                      |
| Fund × Year FE                | No                      | No                      | Yes                     |
| Fund × Industry FE            | No                      | Yes                     | Yes                     |

**Table IA.11 Fund Future Quarterly Return Regressions, Conditioning on Fund Manager Skill (Excluding Funds in the Tri-State Area)**

This table is similar to Table 6 except that it excludes funds located in the tri-state area (NY, NJ, CT). The dependent variable is the value-weighted return of the fund less fees in quarter  $q+1$  ( $VRet_{q+1}$ ).  $Perf\_CAPM/Perf\_Car4/Perf\_BB$  is an indicator variable set to 1 if the fund is in the top-tercile of CAPM alpha, Carhart-4 alpha, or Berk and van Binsbergen (2015) manager skill and 0 otherwise (cols 1-3, respectively).  $COVID$  is an indicator variable set to 1 if the time period is 2020Q1 and 0 otherwise. Control variables are identical to those in Table 3. Refer to Appendix A for detailed variable definitions. Standard errors are double clustered by fund and quarter, with  $t$ -statistics reported in parentheses. \*, \*\*, and \*\*\* indicate significance levels of 10%, 5%, and 1%, respectively.

| Skill Measure $\{Perf\}$               | $Perf\_CAPM$<br>(1)  | $Perf\_Car4$<br>(2)  | $Perf\_BB$<br>(3)    |
|----------------------------------------|----------------------|----------------------|----------------------|
| <i>Hotspot</i>                         |                      |                      |                      |
| $Hotspot \times COVID$                 | -1.147***<br>(-5.37) | -1.326***<br>(-6.79) | -1.568***<br>(-6.90) |
| $Hotspot \times COVID \times \{Perf\}$ | 0.180<br>(0.35)      | 0.869*<br>(2.01)     | 1.971***<br>(5.19)   |
| <i>HiSCI</i>                           |                      |                      |                      |
| $HiSCI \times COVID$                   | -0.753***<br>(-3.60) | -0.602***<br>(-3.00) | -0.673***<br>(-3.17) |
| $HiSCI \times COVID \times \{Perf\}$   | 0.910**<br>(2.83)    | 0.780**<br>(2.41)    | 0.975***<br>(3.68)   |
| <i>GEO</i>                             |                      |                      |                      |
| $GEO \times COVID$                     | 0.013<br>(0.05)      | -0.476*<br>(-2.03)   | -0.441*<br>(-1.83)   |
| $GEO \times COVID \times \{Perf\}$     | -1.229***<br>(-2.94) | 0.270<br>(0.60)      | 0.350<br>(1.13)      |
| $\{Perf\}$                             | 0.329<br>(0.52)      | 0.121<br>(0.28)      | -0.269<br>(-0.72)    |
| $COVID \times \{Perf\}$                | 0.995<br>(1.41)      | -0.336<br>(-0.77)    | -0.715**<br>(-2.84)  |
| $Hotspot \times \{Perf\}$              | -0.009<br>(-0.03)    | 0.119<br>(0.51)      | -0.452<br>(-1.08)    |
| $HiSCI \times \{Perf\}$                | -0.102<br>(-0.39)    | -0.086<br>(-0.31)    | -0.018<br>(-0.09)    |
| $GEO \times \{Perf\}$                  | 0.171<br>(0.75)      | 0.042<br>(0.17)      | -0.070<br>(-0.16)    |
| Observations                           | 34,606               | 34,606               | 36,836               |
| Adjusted R <sup>2</sup>                | 0.800                | 0.800                | 0.799                |
| Controls                               | Yes                  | Yes                  | Yes                  |
| Fund FE                                | Yes                  | Yes                  | Yes                  |
| Fund Style $\times$ Quarter FE         | Yes                  | Yes                  | Yes                  |

**Table IA.12 Impact of COVID Hotspot and Social Connectedness on Stock Selling of Institutional Investors, 2016Q1 to 2020Q2: Focusing on the Post-COVID Period**

This table is similar to Table 3 except that extends the results to the full year of 2020. *Share Change (%)* is the change in the number of shares over the quarter scaled by prior number of shares in percentage form. *COVID* is an indicator variable set to 1 if the time period is 2020Q1 and 0 otherwise. (Column 3 does not include *Hotspot* × 2020Q4 and *HiSCI* × 2020Q4 because this specification includes Fund × Year fixed effects.) Control variables are identical to Table 3. Refer to Appendix A for detailed variable definitions. Standard errors are double clustered by fund and firm, with *t*-statistics reported in parentheses. \*, \*\*, and \*\*\* indicate significance levels of 10%, 5%, and 1%, respectively.

|                        | (1)                   | (2)                   | (3)                   |
|------------------------|-----------------------|-----------------------|-----------------------|
|                        | <i>Share Change %</i> | <i>Share Change %</i> | <i>Share Change %</i> |
| <i>Hotspot</i>         | -0.478<br>(-0.48)     |                       |                       |
| <i>Hotspot</i> ×2020Q1 | -9.342***<br>(-5.16)  | -9.460***<br>(-5.96)  | -10.268***<br>(-5.83) |
| <i>Hotspot</i> ×2020Q2 | 3.970**<br>(2.00)     | 3.315<br>(1.57)       | 5.160**<br>(2.25)     |
| <i>Hotspot</i> ×2020Q3 | 0.716<br>(0.31)       | 0.086<br>(0.03)       | 1.558<br>(0.78)       |
| <i>Hotspot</i> ×2020Q4 | 0.575<br>(0.34)       | -0.688<br>(-0.40)     |                       |
| <i>HiSCI</i>           | -1.797**<br>(-2.30)   |                       |                       |
| <i>HiSCI</i> ×2020Q1   | -10.310***<br>(-3.97) | -11.658***<br>(-4.29) | -11.188***<br>(-4.02) |
| <i>HiSCI</i> ×2020Q2   | 2.273<br>(1.26)       | -0.755<br>(-0.47)     | -2.431<br>(-0.88)     |
| <i>HiSCI</i> ×2020Q3   | 0.054<br>(0.03)       | -1.455<br>(-0.88)     | -2.807<br>(-1.12)     |
| <i>HiSCI</i> ×2020Q4   | 4.113*<br>(1.68)      | 1.052<br>(0.44)       |                       |
| Observations           | 5,795,062             | 5,740,604             | 5,740,491             |
| Adjusted R2            | 0.038                 | 0.108                 | 0.135                 |
| Controls               | No                    | Yes                   | Yes                   |
| Firm × Quarter FE      | No                    | Yes                   | Yes                   |
| Fund FE                | No                    | Yes                   | No                    |
| Fund × Year FE         | No                    | No                    | Yes                   |
| Fund × Industry FE     | No                    | Yes                   | Yes                   |

**Table IA.13 Impact of COVID Hotspot and Social Connectedness on Stock Selling of Institutional Investors, 2016Q1 to 2020Q1: Additional Firm Characteristic Controls**

This table reports the results of the panel regression on how the institutional investors' changes in share ownership differ across hotspot, high-SCI, and low-SCI counties between 2016Q1 and 2020Q1. Columns 1-3 are similar to Table 3, columns 3, 6, and 7, respectively. Note that column 3 uses firm x quarter fixed effects so most firm characteristics are absorbed by these fixed effects. *Share Change (%)* is the change in the number of shares over the quarter scaled by prior number of shares in percentage form. *Share Change Per Shroud* is the change in share holdings scaled by the total number of shares outstanding (in  $10^{-5}$ s). *Size* is the natural log of market capitalization of the firm. *NumEst* is the analysts coverage providing the estimates of earnings. *IO* is the percent of total institutional ownership. *HOTLOC* is indicator variable equals one if the firm's headquarter is located at hotspot county. *MAX* is the daily maximum return in previous month. *IVOL* is the standardized idiosyncratic volatility based on the Fama-French 3 factor model. *Unc\_Beta* measures firms' exposure to economic uncertainty (Baker, Bloom, and Davis 2016). *PRC* is the level of stock price. Standard errors are double clustered by fund and firm, with *t*-statistics reported in parentheses. \*, \*\*, and \*\*\* indicate significance levels of 10%, 5%, and 1%, respectively.

|                               | (1)<br><i>Share Change (%)</i> | (2)<br><i>Share Change (%)</i> | (3)<br><i>Share Change (%)</i> |
|-------------------------------|--------------------------------|--------------------------------|--------------------------------|
| <i>Hotspot</i>                | 1.194<br>(1.14)                |                                |                                |
| <i>Hotspot</i> × <i>COVID</i> | -9.537***<br>(-4.26)           | -9.688***<br>(-4.80)           | -8.918***<br>(-4.32)           |
| <i>HiSCI</i>                  | -1.261<br>(-1.52)              |                                |                                |
| <i>HiSCI</i> × <i>COVID</i>   | -10.781***<br>(-3.79)          | -12.883***<br>(-4.42)          | -11.304***<br>(-3.93)          |
| <i>GEO</i>                    | 0.072<br>(0.08)                |                                |                                |
| <i>GEO</i> × <i>COVID</i>     | -5.464<br>(-1.38)              | -5.662<br>(-1.41)              | -5.034<br>(-1.28)              |
| <i>COVID</i>                  | 5.277***<br>(3.00)             |                                |                                |
| <i>Flow</i>                   | 0.959***<br>(20.16)            | 0.981***<br>(18.50)            | 0.882***<br>(17.08)            |
| <i>HotspotCorp</i>            | 0.008<br>(0.13)                | -0.457*<br>(-1.79)             | -0.978***<br>(-3.24)           |
| <i>LnAge</i>                  | -1.344**<br>(-2.56)            | -1.625<br>(-0.89)              | -5.890*<br>(-1.66)             |
| <i>LnAUM</i>                  | 1.271***<br>(4.88)             | -1.541<br>(-1.04)              | -5.721***<br>(-3.14)           |
| <i>Fund_Mgt_Fees</i>          | -0.792***<br>(-2.78)           | -0.459<br>(-1.47)              | 0.747<br>(1.11)                |
| <i>Fund_Expense</i>           | -3.045*<br>(-1.86)             | 2.862<br>(0.60)                | 9.397<br>(1.64)                |
| <i>Fund_Turnover</i>          | -0.152<br>(-0.43)              | -0.032<br>(-0.11)              | -2.949<br>(-1.50)              |

|                           |                      |                      |                    |
|---------------------------|----------------------|----------------------|--------------------|
| <i>VRet<sub>q-1</sub></i> | 0.007<br>(0.26)      | -0.120*<br>(-1.73)   | -0.133*<br>(-1.83) |
| <i>Size</i>               | 0.319**<br>(2.13)    | 4.894***<br>(9.90)   |                    |
| <i>NumEst</i>             | -0.036**<br>(-2.34)  | -0.043<br>(-1.09)    |                    |
| <i>IO</i>                 | 2.302***<br>(4.00)   | 1.586***<br>(2.64)   |                    |
| <i>HOTLOC</i>             | 0.091<br>(0.38)      | 1.601<br>(0.56)      |                    |
| <i>MAX</i>                | -0.169***<br>(-7.20) | -0.142***<br>(-6.70) |                    |
| <i>IVOL</i>               | 8.335**<br>(2.43)    | -18.365**<br>(-2.38) |                    |
| <i>Unc_Beta</i>           | -1.974<br>(-1.33)    | -0.196<br>(-0.08)    |                    |
| <i>PRC</i>                | -0.000*<br>(-1.92)   | 0.000***<br>(2.75)   |                    |
| Observations              | 4,291,099            | 4,253,723            | 4,252,457          |
| Adjusted R <sup>2</sup>   | 0.040                | 0.071                | 0.113              |
| Firm FE                   | No                   | Yes                  | No                 |
| Fund FE                   | No                   | Yes                  | No                 |
| Quarter FE                | No                   | Yes                  | No                 |
| Fund × Industry FE        | No                   | Yes                  | Yes                |
| Fund × Year FE            | No                   | No                   | Yes                |
| Firm × Quarter FE         | No                   | No                   | Yes                |

---

***Table IA.14 Impact of COVID Hotspot and Social Connectedness on Stock Selling of Institutional Investors, 2016Q1 to 2020Q2: Interactions with Firm and Fund Characteristics***

This table reports the results of the panel regressions on how the institutional investors' changes in share ownership differ across hotspot, high-SCI, and low-SCI counties between 2016Q1 and 2020Q1. The regression is similar to Table 3 column 7 except that an interaction is included for major firm or fund characteristics. *Share Change (%)* is the change in the number of shares over the quarter scaled by prior number of shares in percentage form. *COVID* is an indicator variable set to 1 if the time period is 2020Q1 and 0 otherwise. Panel A shows the interactions with firm characteristics comprising: *Large*, set to 1 if the stock's market capitalization is above the median; *Coverage*, set to 1 if the stock's analyst coverage is above the median; *HighIO*, set to 1 if the stock's total institutional ownership is above the median; *HighBM*, set to 1 if the stock's Book-to-Market ratio is above the median; and *HOTLOC*, set to 1 if the firm's headquarter is in hotspot county. Note that the Firm  $\times$  Quarter fixed effects absorb the *COVID* and *COVID*  $\times$  {Interaction} values. Panel B shows the results that fund characteristics interact with *COVID*; it is similar to Column (7) of Table 3 except that we control for double interaction terms in the form of Characteristics  $\times$  *COVID*. Refer to Appendix A for detailed variable definitions. Standard errors are double clustered by fund and firm, with *t*-statistics reported in parentheses. \*, \*\*, and \*\*\* indicate significance levels of 10%, 5%, and 1%, respectively.

Panel A: Interactions with Firm Characteristics

| Characteristic<br>{Interaction}                       | (1)<br><i>Large</i>   | (2)<br><i>Coverage</i> | (3)<br><i>HighIO</i>  | (4)<br><i>HighBM</i>  | (5)<br><i>HOTLOC</i>  |
|-------------------------------------------------------|-----------------------|------------------------|-----------------------|-----------------------|-----------------------|
| <i>Hotspot</i> × <i>COVID</i>                         | -12.539***<br>(-5.05) | -11.372***<br>(-4.83)  | -8.639***<br>(-4.32)  | -8.093***<br>(-3.98)  | -8.916***<br>(-4.34)  |
| <i>Hotspot</i> × <i>COVID</i> ×{ <i>Interaction</i> } | 7.036***<br>(3.11)    | 4.947***<br>(2.65)     | -0.528<br>(-0.54)     | -0.720<br>(-0.59)     | -0.003<br>(-0.00)     |
| <i>HiSCI</i> × <i>COVID</i>                           | -9.652***<br>(-3.92)  | -9.107***<br>(-3.90)   | -10.575***<br>(-3.56) | -10.627***<br>(-3.52) | -11.240***<br>(-3.94) |
| <i>HiSCI</i> × <i>COVID</i> ×{ <i>Interaction</i> }   | -1.927<br>(-0.60)     | -3.400<br>(-1.30)      | -1.368<br>(-1.37)     | -1.221<br>(-0.97)     | -0.594<br>(-0.43)     |
| <i>GEO</i> × <i>COVID</i>                             | -9.821***<br>(-3.84)  | -8.050***<br>(-3.14)   | -4.622<br>(-1.11)     | -4.451<br>(-1.03)     | -5.252<br>(-1.36)     |
| <i>GEO</i> × <i>COVID</i> ×{ <i>Interaction</i> }     | 8.493*<br>(1.80)      | 5.598<br>(1.45)        | -0.756<br>(-0.69)     | -1.649<br>(-1.35)     | 2.120<br>(1.51)       |
| <i>Hotspot</i> ×{ <i>Interaction</i> }                | 2.339**<br>(2.53)     | 1.184*<br>(1.85)       | 0.427<br>(1.15)       | -0.380<br>(-0.74)     | 1.015**<br>(2.36)     |
| <i>HiSCI</i> ×{ <i>Interaction</i> }                  | 3.744***<br>(3.89)    | 1.289*<br>(1.93)       | 0.462<br>(1.28)       | -0.970**<br>(-1.99)   | -0.166<br>(-0.38)     |
| <i>GEO</i> ×{ <i>Interaction</i> }                    | -0.299<br>(-0.28)     | 0.603<br>(0.84)        | 0.130<br>(0.30)       | 0.978*<br>(1.86)      | -0.008<br>(-0.02)     |
| Observations                                          | 4,252,457             | 4,252,457              | 4,252,457             | 3,494,335             | 4,252,457             |
| Adjusted R <sup>2</sup>                               | 0.113                 | 0.113                  | 0.113                 | 0.113                 | 0.113                 |
| Fund Controls                                         | Yes                   | Yes                    | Yes                   | Yes                   | Yes                   |
| Firm Controls                                         | Yes                   | Yes                    | Yes                   | Yes                   | Yes                   |
| Fund FE                                               | Yes                   | Yes                    | Yes                   | Yes                   | Yes                   |
| Fund × Industry FE                                    | Yes                   | Yes                    | Yes                   | Yes                   | Yes                   |
| Firm × Quarter FE                                     | Yes                   | Yes                    | Yes                   | Yes                   | Yes                   |

Panel B: Controlling for Fund Characteristics

| Characteristic                           | (1)<br>Share Change (%) |
|------------------------------------------|-------------------------|
| <i>Hotspot</i> × <i>COVID</i>            | -3.480**<br>(-2.24)     |
| <i>HiSCI</i> × <i>COVID</i>              | -7.393***<br>(-3.21)    |
| <i>GEO</i> × <i>COVID</i>                | -2.222<br>(-0.66)       |
| <i>Flow</i>                              | 0.837***<br>(16.26)     |
| <i>Flow</i> × <i>COVID</i>               | 0.595***<br>(4.07)      |
| <i>HotspotCorp</i>                       | -0.974***<br>(-3.13)    |
| <i>HotspotCorp</i> × <i>COVID</i>        | -0.094<br>(-1.49)       |
| <i>LnAge</i>                             | -10.153***<br>(-2.98)   |
| <i>LnAge</i> × <i>COVID</i>              | 0.571<br>(0.25)         |
| <i>LnAUM</i>                             | -6.786***<br>(-3.27)    |
| <i>LnAUM</i> × <i>COVID</i>              | -1.170<br>(-1.61)       |
| <i>Fund_Mgt_Fees</i>                     | -0.352<br>(-1.26)       |
| <i>Fund_Mgt_Fees</i> × <i>COVID</i>      | -4.516***<br>(-3.55)    |
| <i>Fund_Expense</i>                      | 6.490<br>(1.21)         |
| <i>Fund_Expense</i> × <i>COVID</i>       | -2.170<br>(-0.68)       |
| <i>Fund_Turnover</i>                     | -2.435<br>(-1.43)       |
| <i>Fund_Turnover</i> × <i>COVID</i>      | -1.801<br>(-1.42)       |
| <i>VRet<sub>q-1</sub></i>                | -0.124*<br>(-1.86)      |
| <i>VRet<sub>q-1</sub></i> × <i>COVID</i> | 0.215<br>(0.72)         |
| Observations                             | 4,827,816               |
| Adjusted R <sup>2</sup>                  | 0.133                   |
| Fund × Year FE                           | Yes                     |
| Fund × Industry FE                       | Yes                     |
| Firm × Quarter FE                        | Yes                     |

**Table IA.15 Placebo Test: Impact of COVID-19 and Social Connectedness on Stock Ownership of Institutional Investors, 2016Q1 to 2020Q1, Index Funds Only**

This table reports the results of the panel regressions on how the institutional investors' changes in share ownership differ across hotspot, high-SCI, and low-SCI counties between Q1 of 2016 and Q1 of 2020. For this table the sample only includes index funds and excludes any actively managed funds. *Share Change (%)* is the change in the number of shares over the quarter scaled by prior number of shares in percentage form. *COVID* is an indicator variable set to 1 if the time period is 2020Q1 and 0 otherwise. Controls are similar to Table 2. Refer to Appendix A for detailed variable definitions. Standard errors are double clustered by fund and firm, with *t*-statistics reported in parentheses. \*, \*\*, and \*\*\* indicate significance levels of 10%, 5%, and 1%, respectively.

|                               | (1)<br><i>Share Change (%)</i> | (2)<br><i>Share Change (%)</i> | (3)<br><i>Share Change (%)</i> |
|-------------------------------|--------------------------------|--------------------------------|--------------------------------|
| <i>Hotspot</i>                | 2.370**<br>(2.50)              |                                |                                |
| <i>Hotspot</i> × <i>COVID</i> | 3.055<br>(0.99)                | 3.974<br>(1.25)                | 5.314*<br>(1.83)               |
| <i>HiSCI</i>                  | 3.151**<br>(2.54)              |                                |                                |
| <i>HiSCI</i> × <i>COVID</i>   | -2.989<br>(-0.81)              | -3.415<br>(-0.93)              | -2.019<br>(-0.61)              |
| <i>GEO</i>                    | -0.526<br>(-0.57)              |                                |                                |
| <i>GEO</i> × <i>COVID</i>     | 2.795<br>(0.99)                | 1.985<br>(0.68)                | 3.957<br>(1.45)                |
| <i>COVID</i>                  | -6.420**<br>(-2.42)            |                                |                                |
| Observations                  | 5,249,883                      | 5,238,337                      | 5,231,143                      |
| Adjusted R <sup>2</sup>       | 0.080                          | 0.151                          | 0.324                          |
| Controls                      | Yes                            | Yes                            | Yes                            |
| Firm FE                       | No                             | Yes                            | No                             |
| Fund FE                       | No                             | Yes                            | No                             |
| Quarter FE                    | No                             | Yes                            | No                             |
| Firm × Quarter FE             | No                             | No                             | Yes                            |
| Fund × Year FE                | No                             | No                             | Yes                            |
| Fund × Industry FE            | No                             | Yes                            | Yes                            |
